# Supplementary material
Source: PubMed Central journal article supplement (PMC6256785)
Supplement: zac012187665s1.pdf [file zac012187665s1.pdf]

## SUPPLEMENTAL MATERIAL

**TABLE S1** MLST alleles and *spa* type repeats succession of the different isolates.

| Isolate | LZD<br>MIC*<br>(mg/L) | ST   | <i>arcc</i> | <i>aroe</i> | <i>glpf</i> | <i>gmk_</i> | <i>pta_</i> | <i>tpi_</i> | <i>yqil</i> | <i>spa</i> type | <i>spa</i> type repeats succession        |
|---------|-----------------------|------|-------------|-------------|-------------|-------------|-------------|-------------|-------------|-----------------|-------------------------------------------|
| LimS    | 0,75                  | 72   | 1           | 4           | 1           | 8           | 4           | 4           | 3           | t148            | 07-23-12-21-12-17-20-17-12-12-17          |
| LimR1   | >256                  | 72   | 1           | 4           | 1           | 8           | 4           | 4           | 3           | t148            | 07-23-12-21-12-17-20-17-12-12-17          |
| LimR2   | 16                    | 72   | 1           | 4           | 1           | 8           | 4           | 4           | 3           | t148            | 07-23-12-21-12-17-20-17-12-12-17          |
| LimR3   | 8                     | 72   | 1           | 4           | 1           | 8           | 4           | 4           | 3           | t148            | 07-23-12-21-12-17-20-17-12-12-17          |
| LimR4   | 24                    | 72   | 1           | 4           | 1           | 8           | 4           | 4           | 3           | t148            | 07-23-12-21-12-17-20-17-12-12-17          |
| LimR5   | 8                     | 72   | 1           | 4           | 1           | 8           | 4           | 4           | 3           | t148            | 07-23-12-21-12-17-20-17-12-12-17          |
| LimR6   | 8                     | 4898 | 1           | 4           | 1           | 370         | 33          | 4           | 3           | t148            | 07-23-12-21-12-17-20-17-12-12-17          |
| LimR7   | 64                    | 72   | 1           | 4           | 1           | 8           | 4           | 4           | 3           | t148            | 07-23-12-21-12-17-20-17-12-12-17          |
| LimR8   | 32                    | 72   | 1           | 4           | 1           | 8           | 4           | 4           | 3           | NA              | 07-23-12-21-12-17-20-17-12-12- <b>77</b>  |
| LimR9   | 24                    | 72   | 1           | 4           | 1           | 8           | 4           | 4           | 3           | t148            | 07-23-12-21-12-17-20-17-12-12-17          |
| LimR10  | 64                    | 72   | 1           | 4           | 1           | 8           | 4           | 4           | 3           | t148            | 07-23-12-21-12-17-20-17-12-12-17          |
| LimR11  | 24                    | 72   | 1           | 4           | 1           | 8           | 4           | 4           | 3           | NA              | 07-23-12-21-12-17-20-17- <b>25</b> -12-17 |
| LimR12  | 16                    | 72   | 1           | 4           | 1           | 8           | 4           | 4           | 3           | t148            | 07-23-12-21-12-17-20-17-12-12-17          |

\*: LZD resistance is defined by an MIC > 4 mg/L by EUCAST and CLSI for *S. aureus*; NA:

not assigned (the *spa* type has no number yet)

**TABLE S2** Virulome of Lim isolates comparing with reference strains used in the study

| <b>virulence factor</b> | <b>protein function</b>                 | <b>LIM</b> | <b>2148</b> | <b>FORC_012</b> | <b>N315</b> | <b>USA300</b> |
|-------------------------|-----------------------------------------|------------|-------------|-----------------|-------------|---------------|
| <b>Exoenzyme</b>        |                                         |            |             |                 |             |               |
| <i>aur</i>              | aureolysin                              | +          | +           | +               | +           | +             |
| <i>splB</i>             | serine protease B                       | +          | +           | +               | +           | +             |
| <i>splA</i>             | serine protease A                       | +          | +           | +               | +           | +             |
| <i>splE</i>             | serine protease E                       |            | +           |                 |             | +             |
| <b>Hostimm</b>          |                                         |            |             |                 |             |               |
| <i>sak</i>              | staphylokinase                          | +          | +           | +               | +           | +             |
| <i>scn</i>              | staphylococcal complement inhibitor     | +          | +           | +               | +           | +             |
| <i>ACME</i>             | Arginine catabolic mobile element       |            |             |                 |             | +             |
| <b>Toxin</b>            |                                         |            |             |                 |             |               |
| <i>hly</i>              | beta-hemolysin                          | +          | +           | +               | +           | +             |
| <i>hlyA</i>             | gamma-hemolysin chain II precursor      | +          | +           | +               | +           | +             |
| <i>hlyB</i>             | gamma-hemolysin component B precursor   | +          | +           | +               | +           | +             |
| <i>hlyC</i>             | gamma-hemolysin component C             | +          | +           | +               | +           | +             |
| <i>lukD</i>             | leukocidin D component                  | +          | +           | +               | +           | +             |
| <i>lukE</i>             | leukocidin E component                  | +          | +           | +               | +           | +             |
| <i>seg</i>              | enterotoxin G                           | +          | +           | +               | +           |               |
| <i>sei</i>              | enterotoxin I                           | +          | +           | +               | +           |               |
| <i>sem</i>              | enterotoxin M                           | +          | +           | +               | +           |               |
| <i>sen</i>              | enterotoxin N                           | +          | +           | +               | +           |               |
| <i>seo</i>              | enterotoxin O                           | +          | +           | +               | +           |               |
| <i>seu</i>              | enterotoxin U                           | +          | +           | +               | +           |               |
| <i>sea/sep</i>          |                                         |            |             |                 | +           |               |
| <i>sel</i>              | enterotoxin L                           |            |             |                 | +           |               |
| <i>sec</i>              | enterotoxin C                           |            |             |                 | +           |               |
| <i>sek</i>              | enterotoxin K                           |            |             |                 |             | +             |
| <i>seq</i>              | enterotoxin Q                           |            |             |                 |             | +             |
| <i>tst</i>              | Toxic shock syndrome toxin-1            |            |             |                 | +           |               |
| <i>lukF-PV</i>          | Panton Valentine leukocidin F component |            |             |                 |             | +             |
| <i>lukS-PV</i>          | Panton Valentine leukocidin S component |            |             |                 |             | +             |
